# Supplementary material for: A pilot study using dynamic contrast enhanced-MRI as a response biomarker of the radioprotective effect of memantine in patients receiving whole brain radiotherapy
Source: PubMed Central journal article supplement (PMC5239453; doi:10.18632/oncotarget.9653), 2016-05-28
Supplement: oncotarget-07-50986-s001.pdf [file oncotarget-07-50986-s001.pdf]

# A pilot study using dynamic contrast enhanced-MRI as a response biomarker of the radioprotective effect of memantine in patients receiving whole brain radiotherapy

## Supplementary Material

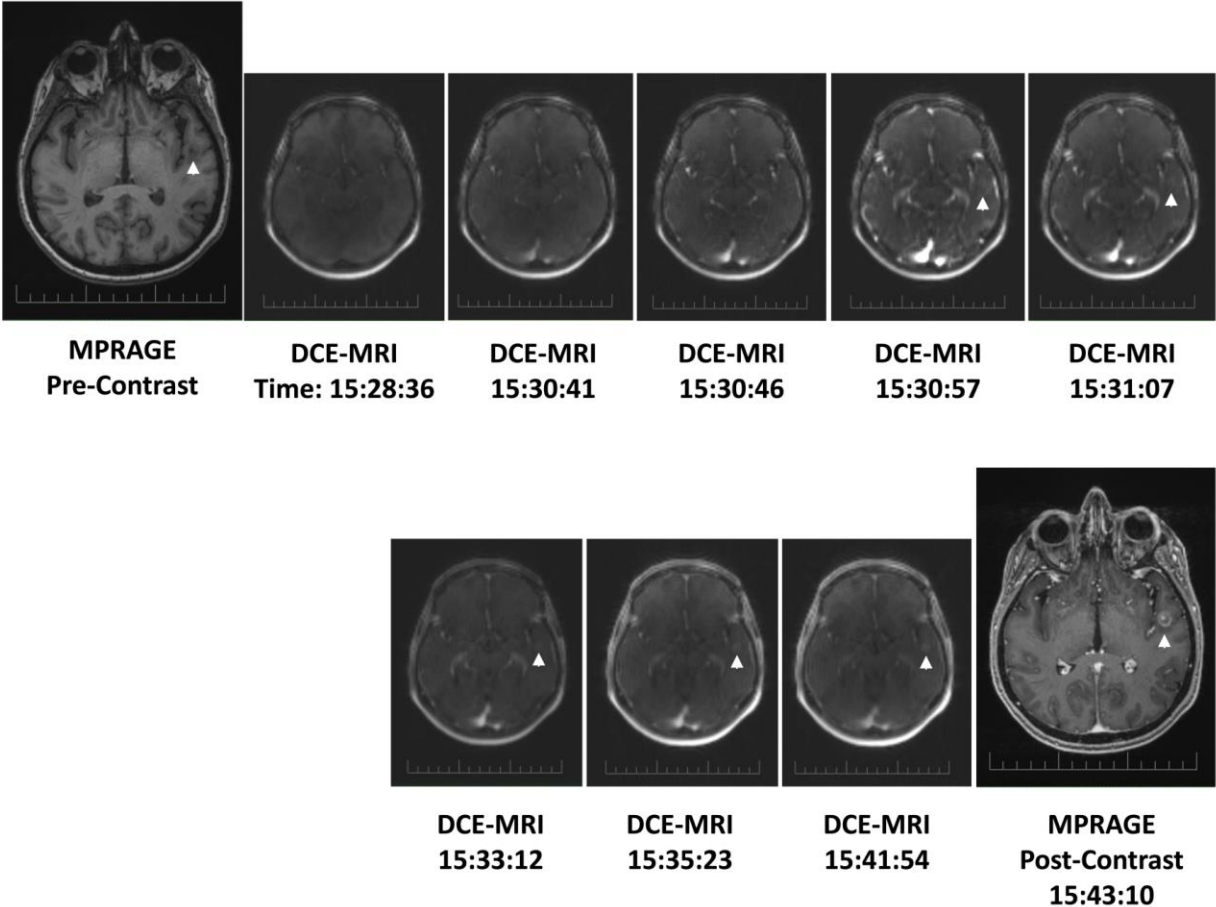

Supplementary Figure 1: Example of dynamic contrast enhanced-MRI images.

## Change in circulating endothelial cells after brain radiotherapy

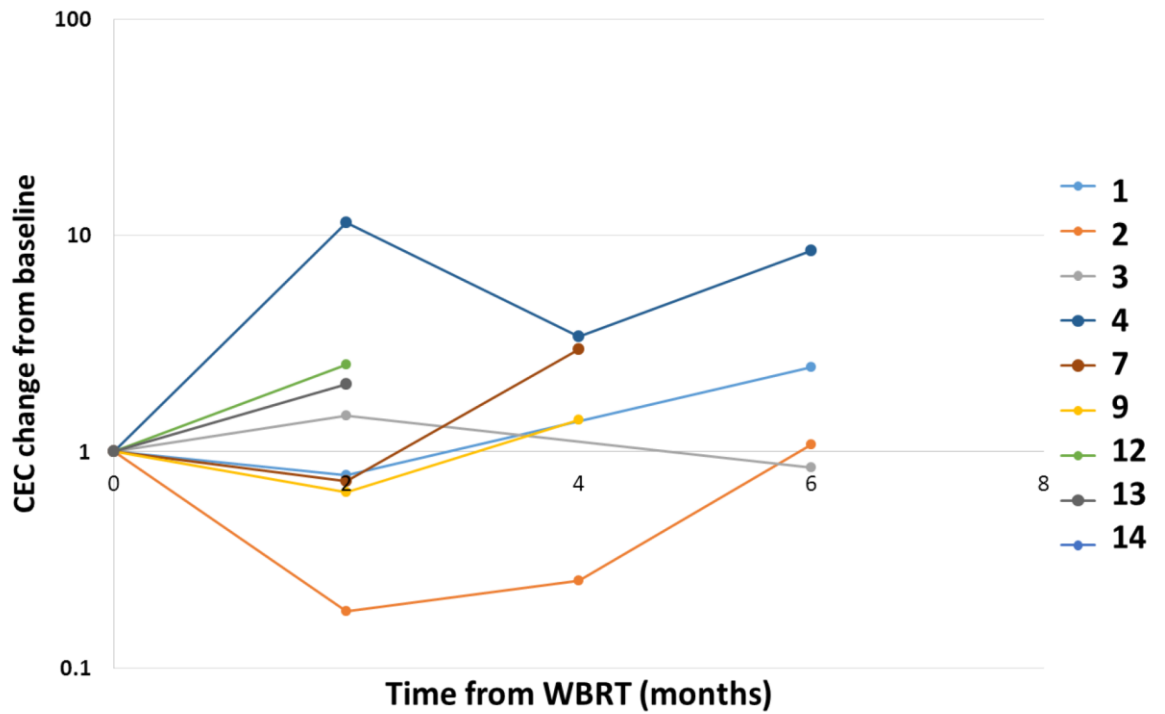

Supplementary Figure 2: Change in circulating endothelial cells (CEC) following whole brain radiotherapy (WBRT). Data was normalized to the baseline level of CEC prior to WBRT.

### GRIN1

### GRIN2A

### GRIN2B

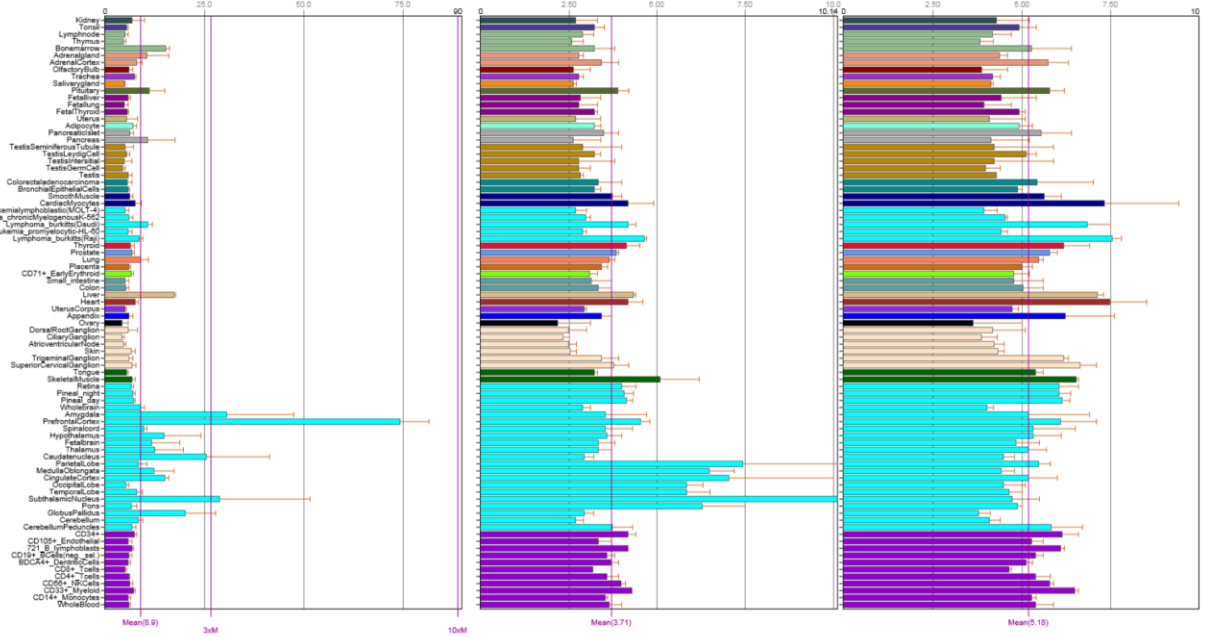

Supplementary Figure 3: Gene expressions of 3 of the NMDA receptor subunits (GRIN1, GRIN2A and GRIN2B) in different human tissues. Data derived from BioGPS Human U133 microarrayGeneAtlas data.

# GRIN1

TISSUE SUBCELL CELL LINE CANCER

ANTIBODY STAINING OVERVIEW ?

Antibodies in assay CAB006831

Tissue presentation order Organ Cell type Alphabetical

| Tissue                                             | Antibody staining            | Tissue                   | Antibody staining           |
|----------------------------------------------------|------------------------------|--------------------------|-----------------------------|
| <b>Nervous system cells</b>                        |                              |                          |                             |
| Soft tissue 1                                      | Peripheral nerve             | Soft tissue 1            | Keratinocytes               |
| Soft tissue 2                                      | Peripheral nerve             | Skin 2                   | Epidermal cells             |
| Cerebral cortex                                    | Neuronal cells               | Vagina                   | Squamous epithelial cells   |
| Hippocampus                                        | Neuronal cells               | Cervix, uterine          | Squamous epithelial cells   |
| Lateral ventricle                                  | Neuronal cells               | Oral mucosa              | Squamous epithelial cells   |
| Cerebellum                                         | Purkinje cells               | Tonsil                   | Squamous epithelial cells   |
| Cerebellum                                         | Cells in granular layer      | Esophagus                | Squamous epithelial cells   |
| Cerebellum                                         | Cells in molecular layer     | <b>Endocrine cells</b>   |                             |
| Colon                                              | Peripheral nerve/ganglion    | Pancreas                 | Islets of Langerhans        |
| Cerebral cortex                                    | Glial cells                  | Thyroid gland            | Glandular cells             |
| Hippocampus                                        | Glial cells                  | Parathyroid gland        | Glandular cells             |
| Lateral ventricle                                  | Glial cells                  | Adrenal gland            | Glandular cells             |
| Cerebral cortex                                    | Neuropil                     | Testis                   | Leydig cells                |
| <b>Hematopoietic cells</b>                         |                              |                          |                             |
| Skin 1                                             | Langerhans                   | <b>Mesenchymal cells</b> |                             |
| Bone marrow                                        | Hematopoietic cells          | Soft tissue 1            | Adipocytes                  |
| Lymph node                                         | Germinal center cells        | Soft tissue 1            | Chondrocytes                |
| Tonsil                                             | Germinal center cells        | Soft tissue 1            | Fibroblasts                 |
| Lymph node                                         | Non-germinal center cells    | Soft tissue 2            | Fibroblasts                 |
| Tonsil                                             | Non-germinal center cells    | Soft tissue 2            | Adipocytes                  |
| Spleen                                             | Cells in white pulp          | Soft tissue 2            | Chondrocytes                |
| Spleen                                             | Cells in red pulp            | Skin 1                   | Fibroblasts                 |
| Appendix                                           | Lymphoid tissue              | Skeletal muscle          | Myocytes                    |
| Lung                                               | Macrophages                  | Heart muscle             | Myocytes                    |
| <b>Glandular and transitional epithelial cells</b> |                              |                          |                             |
| Salivary gland                                     | Glandular cells              | Smooth muscle            | Smooth muscle cells         |
| Stomach 1                                          | Glandular cells              | Endometrium 1            | Cells in endometrial stroma |
| Stomach 2                                          | Glandular cells              | Endometrium 2            | Cells in endometrial stroma |
| Duodenum                                           | Glandular cells              | Ovary                    | Ovarian stroma cells        |
| Small intestine                                    | Glandular cells              | Breast                   | Adipocytes                  |
| Appendix                                           | Glandular cells              | <b>Other cells</b>       |                             |
| Colon                                              | Glandular cells              | Liver                    | Hepatocytes                 |
| Rectum                                             | Glandular cells              | Skin 1                   | Melanocytes                 |
| Liver                                              | Bile duct cells              | Kidney                   | Cells in glomeruli          |
| Gallbladder                                        | Glandular cells              | Kidney                   | Cells in tubules            |
| Pancreas                                           | Exocrine glandular cells     | Lung                     | Pneumocytes                 |
| Breast                                             | Glandular cells              | Testis                   | Cells in seminiferous ducts |
| Cervix, uterine                                    | Glandular cells              | Ovary                    | Follicle cells              |
| Endometrium 1                                      | Glandular cells              | Colon                    | Endothelial cells           |
| Endometrium 2                                      | Glandular cells              | Placenta                 | Decidual cells              |
| Fallopian tube                                     | Glandular cells              | Cerebral cortex          | Endothelial cells           |
| Epididymis                                         | Glandular cells              | Placenta                 | Trophoblastic cells         |
| Prostate                                           | Glandular cells              | Breast                   | Myoepithelial cells         |
| Seminal vesicle                                    | Glandular cells              | CAB006831                |                             |
| Bronchus                                           | Respiratory epithelial cells | CAB006831                |                             |
| Nasopharynx                                        | Respiratory epithelial cells | CAB006831                |                             |
| Urinary bladder                                    | Urothelial cells             | CAB006831                |                             |

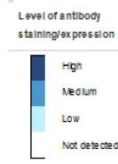

Supplementary Figure 4: NMDA receptor subunit 1 protein expression in different human tissues and cells. Data derived from The Human Protein Atlas.
